# Supplementary material
Source: publisher figshare collection journal article supplement (https://acs.figshare.com/ndownloader/files/17461037)
Supplement: Supplementary file 1 [file 17461037]

## Supporting Information

# Suppressing corrosion of aluminum foils via highly conductive graphene-like carbon coating in high-performance lithium-based batteries

*Xia Li,<sup>†</sup> Sixu Deng,<sup>†</sup> Mohammad Norouzi Banis,<sup>†</sup> Kieran Doyle-Davis,<sup>†</sup> Dongxing Zhang,<sup>†</sup> Tengyuan Zhang,<sup>†</sup> Jun Yang,<sup>†</sup> Ranjith Divigalpitiya,<sup>‡</sup> Frank Brandys,<sup>‡</sup> Ruying Li,<sup>†</sup> and Xueliang Sun<sup>†\*</sup>*

<sup>†</sup> Department of Mechanical and Materials Engineering, University of Western Ontario, ON, N6A 5B9, Canada. E-mail: [xsun@eng.uwo.ca](mailto:xsun@eng.uwo.ca)

<sup>‡</sup> 3M Canada Company 1840 Oxford Street East, London, ON N5V 3R6 Canada

\*Corresponding author's email: [xsun@eng.uwo.ca](mailto:xsun@eng.uwo.ca)

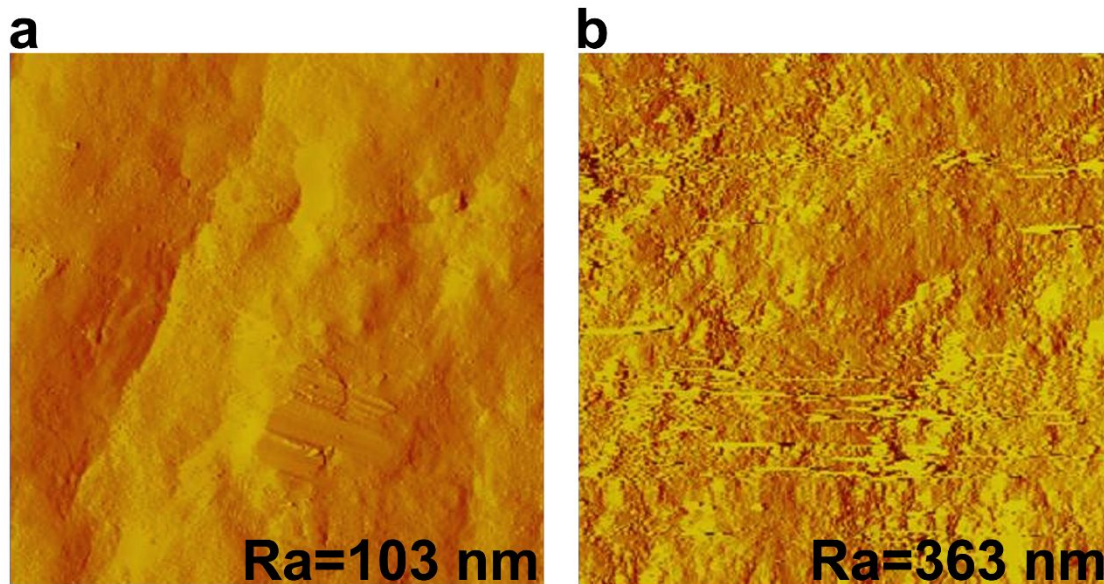

Figure S1. AFM images of (a) bare and (b) GLC coated Al foil. The size of images is 20 x 20  $\mu\text{m}$ . Ra represents the average feature roughness from the foil surface.

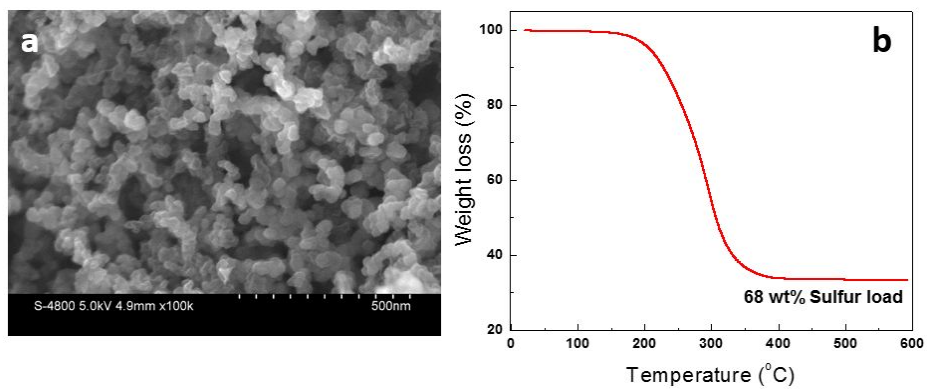

Figure S2. (a) FE-SEM image and (b) TGA curve of as-prepared carbon-sulfur composites.

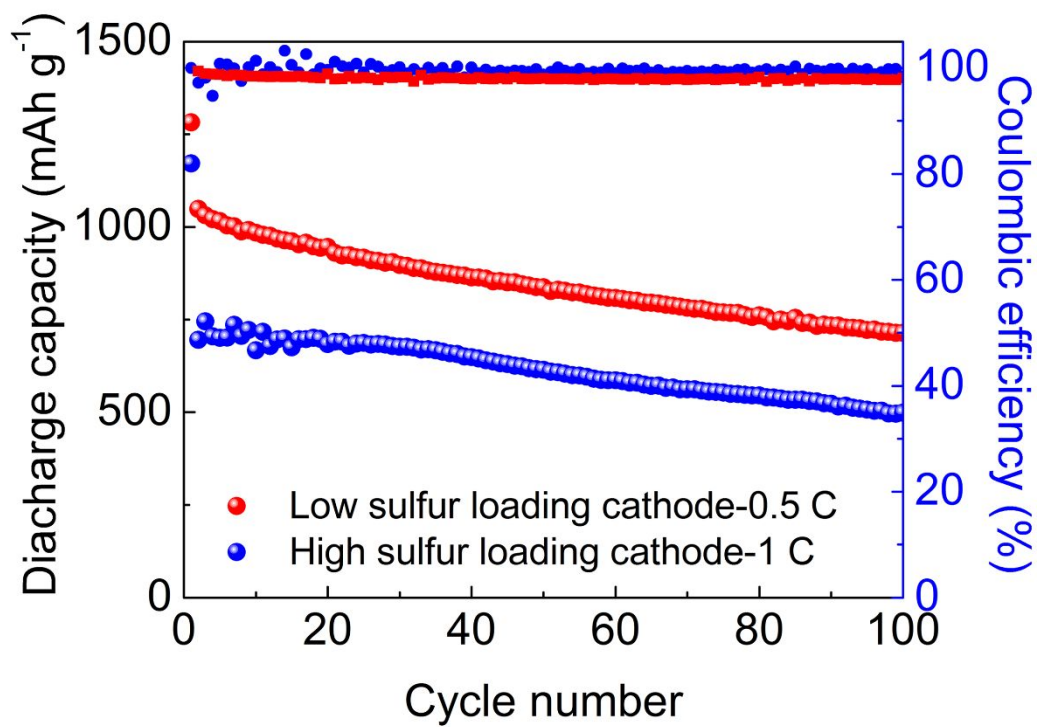

Figure S3. Cycling performance of the sulfur cathodes with low ( $1 \text{ mg cm}^{-2}$ ) and high ( $2 \text{ mg cm}^{-2}$ ) sulfur loadings at different current densities.

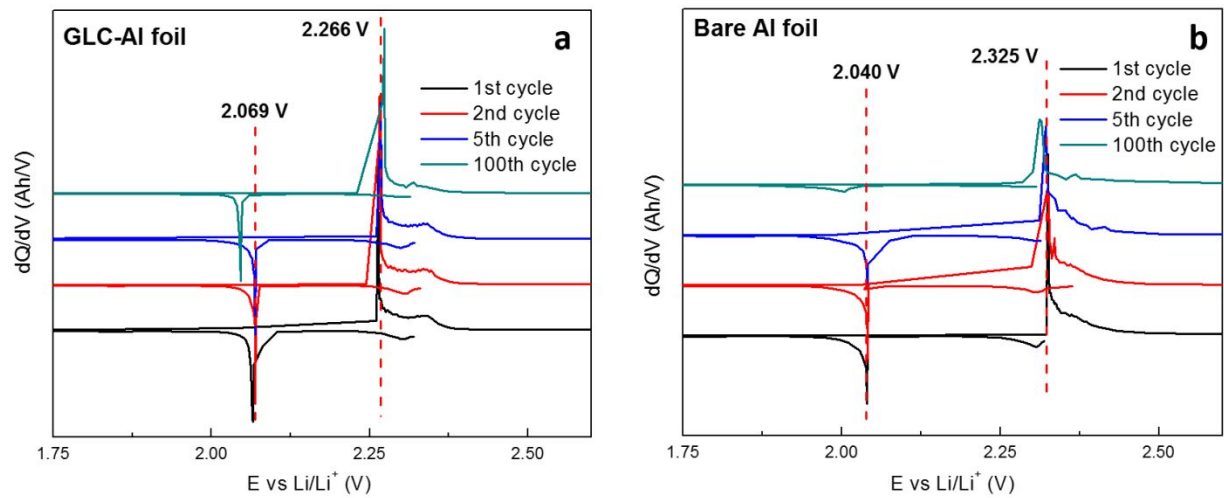

Figure S4.  $dQ/dV$  plots of as-prepared Li-S batteries in different discharge-charge cycles. (a) GLC-Al foil and (b) bare Al foil.

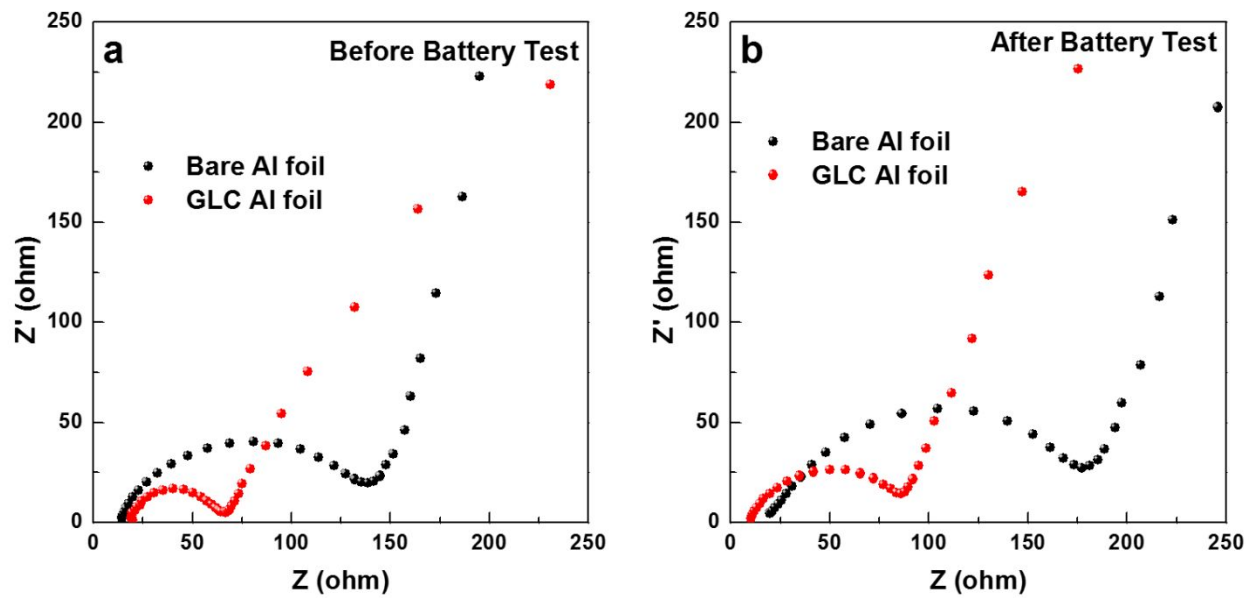

Figure S5. EIS spectra of as-prepared Li-S batteries with different current collectors (a) before and (b) after battery discharge-charge 50 cycles.

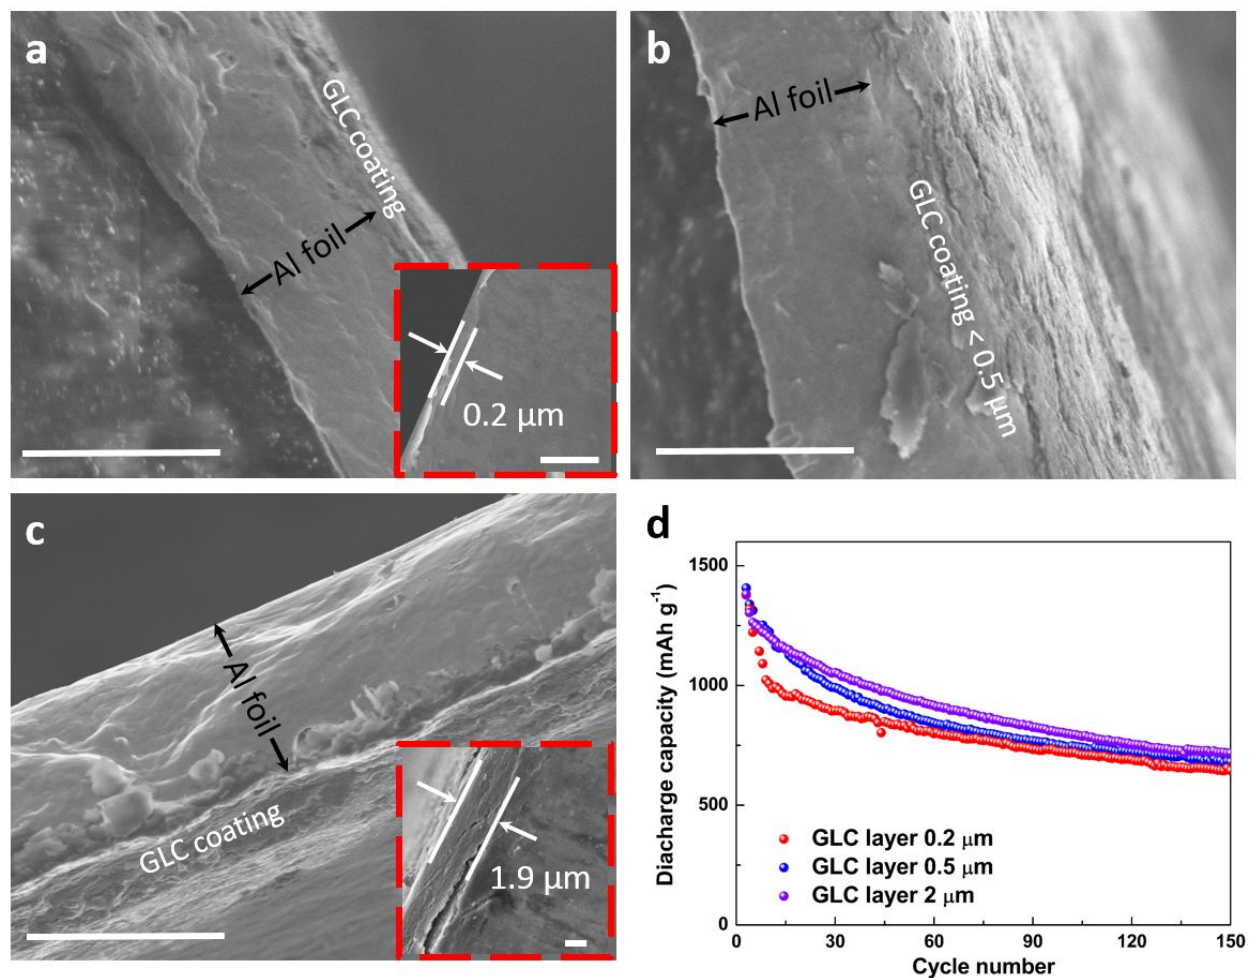

Figure S6. (a-c) FE-SEM images in cross-section view of GLC-Al foils with different thickness of GLC layer in a scale bar of 10  $\mu\text{m}$  and (d) cycle performance of as-prepared C-S electrodes with these GLC Al foils. The scale bar in the inserted image (a, c) is 1  $\mu\text{m}$ .

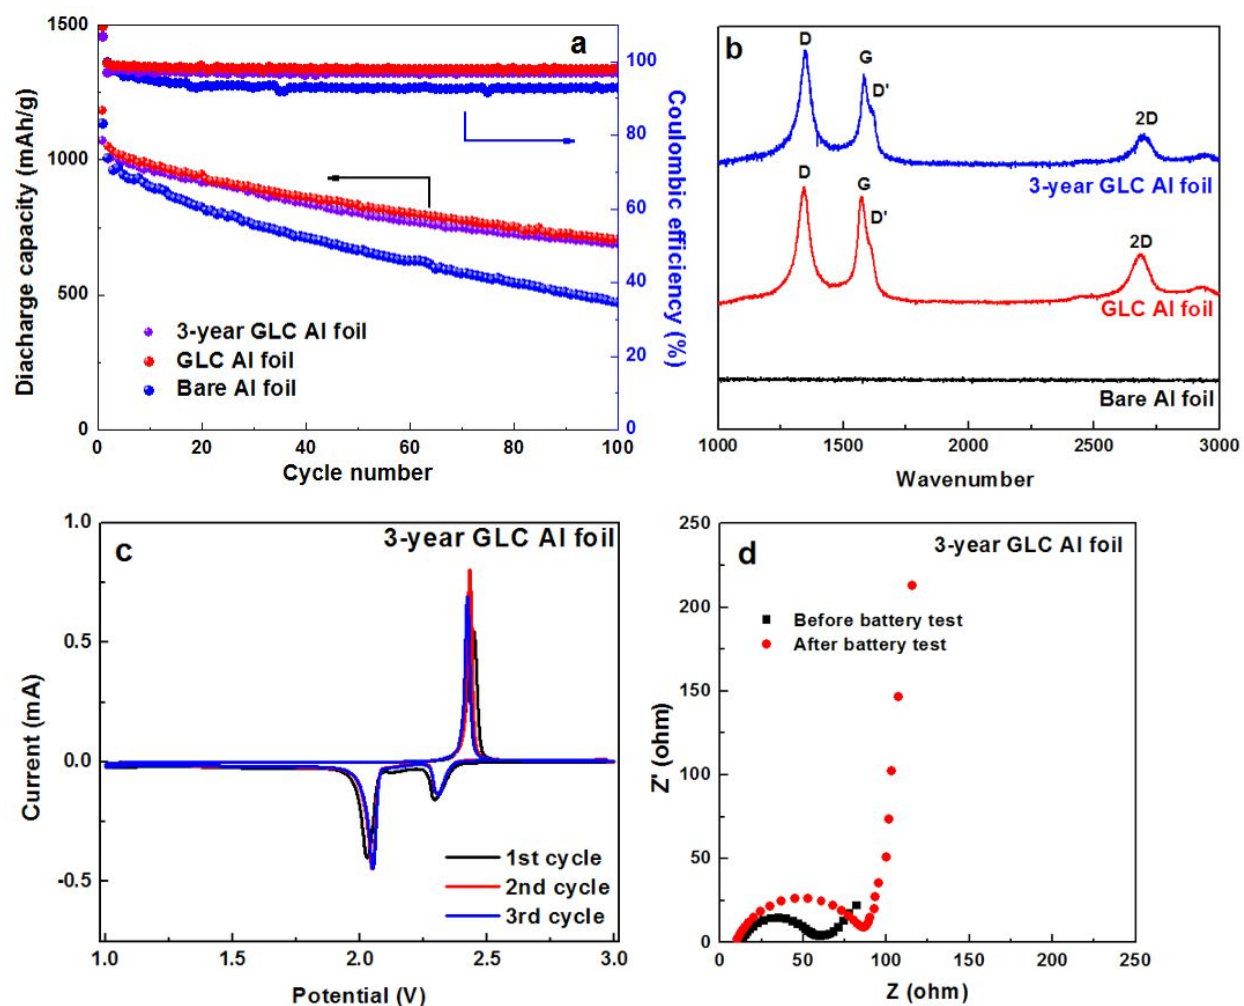

Figure S7. Physical and electrochemical characterizations of 3-year GLC Al foil and as-prepared C-S electrodes. (a) discharge-charge cycling performance at 800 mA g<sup>-1</sup>; (b) Raman spectra; (c) CV curves; and (d) EIS plots.
